# Supplementary material for: Numerical simulation on type IV cracking of ASME P92 steel at high temperature
Source: Royal Society of Chemistry journal article supplement (doi:10.1039/c9em00305c), 2010-12-01
Supplement: c9em00305c1.pdf [file c9em00305c1.pdf]

1 **Supporting Information**

2 **Sorption and Transport of Trenbolone and Altrenogest Photoproducts in Soil-**

3 **Water Systems**

4

5 Xingjian Yang<sup>†,§,⊥, a</sup>, Haoqi Zhao<sup>§,⊥,a</sup>, David M. Cwiertny<sup>||</sup>, Edward P. Kolodziej<sup>\*,‡, §,</sup>  
6 <sup>⊥</sup>

7

8 <sup>†</sup>College of Natural Resources and Environment, South China Agricultural University,

9 Guangzhou, PR China

10 <sup>§</sup>Department of Civil and Environmental Engineering, University of Washington,

11 Seattle, Washington 98195, United States

12 <sup>⊥</sup>Center for Urban Waters, Tacoma, Washington 98421, United States

13 <sup>||</sup>Department of Civil and Environmental Engineering, University of Iowa, Iowa City,

14 Iowa 52242, United States

15 <sup>‡</sup>Interdisciplinary Arts and Sciences, University of Washington Tacoma, Tacoma,

16 Washington 98421, United States

17

18 <sup>a</sup>The co-first authors contributed equally to this study

19

20 <sup>\*</sup>Corresponding author at: Department of Civil and Environmental Engineering,

21 University of Washington, Seattle, Washington 98195, United States;

22 Interdisciplinary Arts and Sciences, University of Washington Tacoma, Tacoma,

23 Washington 98402, United States; Center for Urban Waters, Tacoma, Washington

24 98421, United States. Tel: (253) 692-5659. E-mail address: [koloj@uw.edu](mailto:koloj@uw.edu) (E. P.

25 Kolodziej)

26 **Materials.** 17 $\alpha$ -TBOH was obtained from BDG Synthesis (Wellington, New  
27 Zealand). 17 $\beta$ -TBOH was obtained from Shenzhen Shijingu Technology Co. Ltd  
28 (Shenzhen, China). TBO was purchased from Steraloids Inc (Newport, RI, USA).  
29 ALT and sodium bromide hydrate (NaBr·H<sub>2</sub>O, purity  $\geq$  99.9%) were purchased from  
30 Sigma Aldrich, Inc (St. Louis, MO, USA). Deuterated 17 $\beta$ -TBOH (17 $\beta$ -d<sub>3</sub>-TBOH)  
31 used as internal standard was obtained from the Bank of Reference Standards (RIVM,  
32 Netherlands). Purities of all analytical standards were  $\geq$  95%. 1000 mg/L stock  
33 solutions of the steroids were prepared in methanol and stored at -20 °C. UHPLC  
34 grade methanol, toluene and water were purchased from Fisher Scientific (Pittsburgh,  
35 PA, USA). Dichloro-dimethylsiloxane ( $>$  99%) was purchased from Acros Organics  
36 (Geel, Belgium). All glassware was silanized with a dichloro-  
37 dimethylsiloxane/toluene solution (1:9, v:v) prior to use.

38 **Photoproduct production and quantification.** The production and  
39 quantification methods for photoproducts are described in detail in our earlier work.<sup>1</sup>  
40 Briefly, photoproducts were generated using a solar simulator (EYE Lighting Int.  
41 Model # 93510, EYE Lighting, Mentor, OH) with four high pressure, 150 W xenon  
42 bulbs (Solarlux 150R, EYE Lighting, Mentor, OH). Aqueous solutions of the parent  
43 compounds (0.05-100  $\mu$ g/L) were irradiated in clear borosilicate glass tubes for 6  
44 hours ( $>$ 99% conversion to photoproducts)<sup>2-4</sup> partially immersed in a chilled  
45 recirculating water bath (8-10 °C). For calibration standards of the photoproducts, 500

46  $\mu\text{L}$  of the photoproduct solution was spiked with 0.5 ng of  $17\beta\text{-d}_3\text{-TBOH}$ . Solutions  
47 were then diluted (1:1 v:v) with methanol to enhance chromatography and  
48 immediately analyzed via LC/MS/MS.

49 Photoproduct concentrations in the calibration standards were estimated based on  
50 photoreaction yields reported in our previous studies,<sup>3,4</sup> specifically 73.3% and 6.7%  
51 for 5-OH- $17\alpha$ -TBOH and 12-OH- $17\alpha$ -TBOH, 20% and 60% for 5-OH- $17\beta$ -TBOH  
52 and 12-OH- $17\beta$ -TBOH, and 80% for TBO-OH and 80% for ALT-CAP-OH. To  
53 produce and quantify ALT-CAP, ALT solutions were irradiated for  $\sim 3$  minutes when  
54  $>95\%$  of the parent mass was converted to ALT-CAP with partial conversion to ALT-  
55 CAP-OH. The mass of residual ALT in samples was subtracted from the initial ALT  
56 mass, and the remaining mass was allocated to ALT-CAP and ALT-CAP-OH based  
57 on the ratio of their peak areas and prior observations on their near identical peak area  
58 response via LC/MS/MS detection (data not shown). Photoproduct concentrations in  
59 samples were then calculated via isotope dilution method. Calibration curves ( $\sim 0.1$ -  
60  $100 \mu\text{g/L}$ ) were built on a log-log scale in this study to ensure equal weight of each  
61 data point in regression analysis (Figure S5).

62 Parents and related photoproducts were quantified by an Agilent 1290 HPLC  
63 coupled to an Agilent 6460 mass spectrometer. The LC used an Agilent Poroshell  
64  $120\text{\AA}$  EC C18 column ( $50 \times 3.0 \text{ mm}$ ,  $2.7\mu\text{m}$ ) and a Gemini C18 guard column ( $4 \text{ mm}$   
65  $\times 2.0 \text{ mm}$ ) (Phenomenex, USA) with LC-MS grade methanol and water (gradient  
66 elution mode,  $0.2 \text{ mL/min}$ ) as the mobile phase. To reduce heat-accelerated

67 photoproduct dehydration during analysis, the autosampler tray and chromatographic  
68 columns were maintained at 4 °C and 10 °C, respectively. The multiple reaction  
69 monitoring transitions and retention times of analytes are shown in Table S9 and other  
70 instrumental details can be found in our previous study.<sup>1</sup>

71  **$K_{ow}$  and  $K_{hw}$  measurement.** Octanol and hexane were extracted with 0.1 M  
72 NaOH and rinsed twice with ultra-pure water. The solvents were then passed through  
73 sodium sulfate (~0.5 g) (held on a layer of 0.2 µm glass fiber filter) to remove residual  
74 water. 1 mL of octanol or hexane was then mixed with 3 mL of 10 mg/L aqueous  
75 solutions (in Milli Q water) of the target steroids, and the mixture was equilibrated on  
76 a shaker table (200 rpm, 24 hours). Upon equilibration, the samples were centrifuged  
77 (3000 rpm, 1 h), after which subsamples of the organic phase and aqueous phase were  
78 collected with glass pipettes. The samples were further diluted (organic phase with  
79 methanol and aqueous phase with water) into linear ranges of the respective  
80 calibration curves for LC-MS/MS analysis. For  $K_{ow}$  measurement of parent  
81 compounds, octanol was diluted 500X and water was analyzed directly. For  $K_{hw}$   
82 measurement of parent compounds, hexane and water were diluted 500X and 1000X,  
83 respectively. Octanol and water were diluted 500X and 20X in  $K_{ow}$  measurement of  
84 photoproducts, and hexane and water were diluted 0.1X and 100X in  $K_{hw}$   
85 measurement of photoproducts, respectively.

86 **Batch Sorption Isotherms.** Linear isotherm (i.e., Equation (S1)) was used to fit  
87 the batch sorption data

88 
$$(S1) \quad C_s = K_d \times C_w$$

89 where  $C_s$ ,  $C_w$  were steroid concentrations of sorbed and aqueous phases, respectively.

90  $K_d$  (L/kg) is the linear distribution coefficient.  $K_d$  was then normalized to organic

91 carbon content ( $f_{oc}$ ) of the soil-sand mixture to produce  $K_{oc}$  (Equation (S2))

92 
$$(S2) \quad K_{oc} = \frac{K_d}{f_{oc}}$$

93 **Transport modelling.** Column transport parameters were estimated with

94 CXTFIT 2.1 program,<sup>5</sup> which models solute transport by an equilibrium convection-

95 dispersion equation (CDE) that assumes one-dimensional transport of reactive solutes

96 subject to adsorption, first-order degradation, and zero-order production in a

97 homogeneous soil. The dimensionless form of the CDE equation can be written as:

98 The dimensionless form of the CDE equation can be written as:

99 
$$(S5) \quad R \frac{\partial C}{\partial T} = \frac{1}{P} \frac{\partial^2 C}{\partial Z^2} - \frac{\partial C}{\partial Z} - \mu^E C + \gamma^E(Z)$$

100 where  $C = c/c_0$ ,  $T = vt/L$ ,  $Z = x/L$ ,  $P = vL/D$ ,  $\mu^E = \mu L/v$ , and  $\gamma^E = \gamma L/vc_0$  are

101 dimensionless.  $c$  is the concentration in the liquid phase ( $\mu\text{g/L}$ ),  $x$  and  $t$  are distance

102 (cm) and time (min), respectively.  $D$  represents the dispersion coefficient ( $\text{cm}^2/\text{min}$ ),  $v$

103 is the pore water velocity (cm/min),  $\mu$  is the first-order decay coefficient for solute

104 degradation ( $\text{min}^{-1}$ ), and  $\gamma$  is the zero-order production coefficient ( $\text{cm}^{-1}$ ).  $c_0$  and  $L$  are

105 the characteristic concentration ( $\mu\text{g/L}$ ) and length (cm), respectively.  $R$  represents the

106 retardation factor.

107 CXTFIT can also model non-equilibrium transport. Physical non-equilibrium is

108 modelled by partitioning the liquid phase into mobile and stagnant regions. In contrast,  
109 chemical non-equilibrium is considered as a two-site system, which assumes that  
110 some of the sites (type-1 sites) are at equilibrium while type-2 sites represent  
111 kinetically limited adsorption sites. The chemical and physical non-equilibrium  
112 models can be reduced to a same form when using dimensionless parameters:

113 
$$(S6) \quad \beta R \frac{\partial C_1}{\partial T} = \frac{1}{P} \frac{\partial^2 C_1}{\partial Z^2} - \frac{\partial C_1}{\partial Z} - \omega(C_1 - C_2)$$

114 where subscripts 1 and 2 refer to equilibrium and non-equilibrium sites, respectively.  
115  $\beta$  is a partitioning coefficient and  $\omega$  is a dimensionless mass transfer coefficient. For  
116 two-sites non-equilibrium model,  $\beta$  represents the fraction of “Type-1” sites  
117 contributing to instantaneous sorption,  $\omega$  represents ratio of column hydraulic  
118 retention time to timescales for chemical partitioning.  $C_1$  and  $C_2$  represent the  
119 dimensionless solute concentration in equilibrium and nonequilibrium sites,  
120 respectively.  $P$  is the Peclet number.

121 **Quality assurance and quality control.** To improve sensitivity and reduce  
122 formation of  $[M+Na]^+$  adducts during ionization, all glassware was rinsed with  
123 ultrapure water and methanol for three times and silanized prior to use. Solute  
124 retention times (within 2%) and the relative abundance (within 20%) of two selected  
125 MRM transitions needed to match analytical standards. Isotope dilution quantification  
126 was used to account for sample preparation, matrix effect, and instrumental response  
127 variation. Method detection limit (MDL) was defined as standard concentration where  
128 signal-to-noise ratio of 3 was observed, respectively. MDLs for parent steroids were

129 0.006-0.14  $\mu\text{g/L}$ , and for photoproducts were 0.008-0.60  $\mu\text{g/L}$  (Table S2). For column  
130 studies, procedural blanks were conducted by quantifying solutes in column effluents  
131 ( $N = 4$ ) where model water (without steroids) was the input solution. No steroids or  
132 interferences were detected in these trials. Then, matrix effect tests ( $N = 8$ ) were  
133 conducted by spiking 10  $\mu\text{g/L}$  of  $17\alpha\text{-TBOH}$ , ALT, and corresponding photoproducts  
134 into column effluents. The matrix effect factors were evaluated as the peak area ratio  
135 of analytes in column effluents to analytes in standard solutions, and were 66-85% for  
136  $17\alpha\text{-TBOH}$ , ALT, and the photoproducts. The matrix effect factor for  $17\beta\text{-d3-TBOH}$   
137 was 74%, which well matched the matrix effect factors of target analytes (Table S2).  
138 Precision ( $N = 8$ ) was evaluated as the relative standard deviations of triplicate  
139 quantifications of one column effluent, and was 3-9% for  $17\alpha\text{-TBOH}$ , ALT, and the  
140 photoproducts (Table S2).

141 **References**

- 142 1. P. T. Kenyon, H. Zhao, X. Yang, C. Wu, D. M. Cwiertny and E. P. Kolodziej,  
143 Detection and quantification of metastable photoproducts of trenbolone and  
144 altrenogest using liquid chromatography-tandem mass spectrometry, *J. Chromatogr.*  
145 *A*, 2019, **1603**, 150-159.
- 146 2. S. Qu, E. P. Kolodziej and D. M. Cwiertny, Phototransformation rates and  
147 mechanisms for synthetic hormone growth promoters used in animal agriculture,  
148 *Environ. Sci. Technol.*, 2012, **46**, 13202-13211.
- 149 3. J. Baltrusaitis, E. V. Patterson, M. O'Connor, S. Qu, E. P. Kolodziej and D. M.  
150 Cwiertny, Reversible photohydration of trenbolone acetate metabolites: Mechanistic  
151 understanding of product-to-parent reversion through complementary experimental  
152 and theoretical approaches, *Environ. Sci. Technol.*, 2016, **50**, 6753-6761.
- 153 4. K. H. Wammer, K. C. Anderson, P. R. Erickson, S. Kliegman, M. E. Moffatt, S.  
154 M. Berg, J. A. Heitzman, N. C. Pflug, K. McNeill, D. Martinovic-Weigelt, R.  
155 Abagyan, D. M. Cwiertny and E. P. Kolodziej, Environmental photochemistry of  
156 altrenogest: photoisomerization to a bioactive product with increased environmental  
157 persistence via reversible photohydration, *Environ. Sci. Technol.*, 2016, **50**, 7480-  
158 7488.
- 159 5. N. Toride, The CXTFIT code for estimating transport parameters from laboratory  
160 or field tracer experiments. Version 2.0, *U.S. Salinity Laboratory Res. Rep.*, 1995.



161 **Table S1.** Physical-chemical properties of model soil used in batch and column  
 162 studies.

| parameter             | value           | parameters             | value |
|-----------------------|-----------------|------------------------|-------|
| pH                    | 6.36            | metal K                | 827   |
| organic carbon (%)    | 1.13            | content Mg             | 7120  |
| CEC (meq/100 g)       | 11.5            | ( $\mu\text{g/g}$ ) Mn | 393   |
| total nitrogen (%)    | 0.086           | Mo                     | 31.1  |
| metal Al              | 11400           | Na                     | 113   |
| content As            | ND <sup>a</sup> | Ni                     | 46.1  |
| ( $\mu\text{g/g}$ ) B | 35.3            | P                      | 962   |
| Ba                    | 49.2            | Pb                     | 48.4  |
| Ca                    | 2870            | S                      | 215   |
| Cd                    | ND              | Se                     | 43.6  |
| Cr                    | 23.3            | Zn                     | 60.4  |
| Cu                    | 17.4            | Si                     | 353   |
| Fe                    | 21400           | Ag                     | ND    |

163 <sup>a</sup> ND = Not detected.

164 **Table S2.** Calibration curve linearity, method detection limits, matrix effect and  
 165 precision in soil column experiments for the target compounds.

| analyte        | R <sup>2</sup> | MDLs<br>(µg/L) | matrix<br>effect<br>(%) | precision<br>(%) |
|----------------|----------------|----------------|-------------------------|------------------|
| 17α-TBOH       | 0.999          | 0.006          | 85                      | 3                |
| 5-OH-17α-TBOH  | 0.999          | 0.37           | 75                      | 7                |
| 12-OH-17α-TBOH | 0.998          | 0.44           | 66                      | 9                |
| 17β-TBOH       | 0.999          | 0.013          | -                       | -                |
| 5-OH-17β-TBOH  | 0.998          | 0.52           | -                       | -                |
| 12-OH-17β-TBOH | 0.995          | 0.60           | -                       | -                |
| TBO            | 0.999          | 0.14           | -                       | -                |
| TBO-OH         | 0.999          | 0.17           | -                       | -                |
| ALT            | 0.999          | 0.022          | 83                      | 8                |
| ALT-CAP        | 0.999          | 0.008          | 68                      | 6                |
| ALT-CAP-OH     | 0.999          | 0.11           | 64                      | 3                |
| 17β-d3-TBOH    | -              | -              | 74                      | -                |

167 **Table S3.** Isotherm data for TBA metabolites and ALT. Batch sorption was tested in duplicate experiments, plus a water control with no load of  
 168 soil to test on the aqueous phase stability of TBA metabolites and ALT during equilibration period.  $C_{in}$  ( $\mu\text{g/L}$ ),  $C_w$  ( $\mu\text{g/L}$ ) and  $C_s$  ( $\mu\text{g/kg}$ ) are  
 169 input concentrations and concentrations in the aqueous and sorbed phases, respectively.

| $C_{in}$ |                 | 17 $\alpha$ -TBOH |                   |                   | 17 $\beta$ -TBOH |       |                   | TBO   |       |                   | ALT   |       |                   |
|----------|-----------------|-------------------|-------------------|-------------------|------------------|-------|-------------------|-------|-------|-------------------|-------|-------|-------------------|
|          |                 | $C_w$             | $C_s$             | mass recovery (%) | $C_w$            | $C_s$ | mass recovery (%) | $C_w$ | $C_s$ | mass recovery (%) | $C_w$ | $C_s$ | mass recovery (%) |
| 0.1      | 1               | 0.059             | 0.10              | 84                | 0.056            | 0.14  | 91                | 0.033 | 0.28  | 103               | 0.055 | 0.22  | 109               |
|          | 2               | 0.096             | 0.10              | 121               | 0.033            | 0.13  | 65                | 0.048 | 0.22  | 104               | 0.050 | 0.21  | 103               |
|          | no-soil control | 0.059             | n.a. <sup>a</sup> | 59                | 0.078            | n.a.  | 78                | 0.031 | n.a.  | 31                | 0.060 | n.a.  | 60                |
| 0.5      | 1               | 0.34              | 0.54              | 94                | - <sup>b</sup>   | -     | -                 | 0.22  | 1.1   | 99                | -     | -     | -                 |
|          | 2               | 0.33              | 0.72              | 102               | -                | -     | -                 | 0.25  | 1.2   | 112               | -     | -     | -                 |
|          | no-soil control | 0.25              | n.a.              | 51                | -                | -     | -                 | 0.22  | n.a.  | 43                | -     | -     | -                 |
| 1        | 1               | 0.63              | 0.94              | 86                | 0.54             | 1.3   | 87                | 0.44  | 1.7   | 87                | 0.53  | 2.1   | 105               |
|          | 2               | 0.66              | 1.1               | 93                | 0.52             | 1.2   | 83                | 0.43  | 2.7   | 109               | 0.51  | 1.8   | 95                |
|          | no-soil control | 0.81              | n.a.              | 81                | 0.85             | n.a.  | 85                | 0.54  | n.a.  | 54                | 1.0   | n.a.  | 104               |
| 5        | 1               | 3.4               | 5.8               | 98                | -                | -     | -                 | 2.9   | 9.6   | 107               | 3.3   | 11    | 120               |
|          | 2               | 3.5               | 5.6               | 98                | -                | -     | -                 | 3.1   | 9.9   | 111               | 2.9   | 7.7   | 96                |
|          | no-soil control | 2.2               | n.a.              | 45                | -                | -     | -                 | 3.3   | n.a.  | 65                | 3.6   | n.a.  | 73                |
| 10       | 1               | 6.3               | 14                | 99                | 7.2              | 11    | 100               | 5.3   | 16    | 93                | 5.1   | 17    | 94                |
|          | 2               | 7.4               | 9.9               | 99                | 5.8              | 14    | 93                | 5.5   | 23    | 112               | 5.3   | 16    | 94                |
|          | no-soil control | 7.5               | n.a.              | 75                | 10               | n.a.  | 102               | 3.5   | n.a.  | 35                | 8.0   | n.a.  | 80                |

170 <sup>a</sup> n.a.: not applicable. The control only contained aqueous phase.

171 <sup>b</sup> The sorption of 17 $\beta$ -TBOH was not tested under 0.5  $\mu\text{g/L}$  and 5  $\mu\text{g/L}$ , and the sorption of ALT was not tested under 0.5  $\mu\text{g/L}$ , due to  
 172 inconsistent experiment design for different batches of experiment.

173 **Table S4.** Isotherm data for photoproducts of TBA metabolites and ALT in static soil-water systems. Batch sorption was tested in duplicate which  
 174 included a no-soil control and a dark control.  $C_{in}$ ( $\mu\text{g/L}$ ),  $C_w$  ( $\mu\text{g/L}$ ) and  $C_s$  ( $\mu\text{g/kg}$ ) are input concentrations and concentrations in the aqueous and sorbed  
 175 phases, respectively.

| $C_{in}$ | 17 $\alpha$ -TBOH photoproducts |       |                         |                 |                   |       |                   |                       | 17 $\beta$ -TBOH photoproducts |                        |       |                  |       |                   |     |  |
|----------|---------------------------------|-------|-------------------------|-----------------|-------------------|-------|-------------------|-----------------------|--------------------------------|------------------------|-------|------------------|-------|-------------------|-----|--|
|          | 5-OH-17 $\alpha$ -TBOH          |       | 12-OH-17 $\alpha$ -TBOH |                 | 17 $\alpha$ -TBOH |       | mass recovery (%) | 5-OH-17 $\beta$ -TBOH |                                | 12-OH-17 $\beta$ -TBOH |       | 17 $\beta$ -TBOH |       | mass recovery (%) |     |  |
|          | $C_w$                           | $C_s$ | $C_w$                   | $C_s$           | $C_w$             | $C_s$ |                   | $C_w$                 | $C_s$                          | $C_w$                  | $C_s$ | $C_w$            | $C_s$ |                   |     |  |
| 1        | 1                               | 0.80  | 0.39                    | ND <sup>a</sup> | ND                | 0.065 | 0.11              | 119                   | ND                             | ND                     | ND    | ND               | ND    | ND                | 0   |  |
|          | 2                               | 0.82  | 0.46                    | ND              | ND                | 0.074 | 0.12              | 117                   | ND                             | ND                     | ND    | ND               | ND    | ND                | 0   |  |
|          | no-soil control                 | 0.61  | n.a. <sup>b</sup>       | ND              | n.a.              | 0.11  | n.a.              | 76                    | ND                             | n.a.                   | ND    | n.a.             | ND    | n.a.              | 0   |  |
|          | dark control                    | ND    | ND                      | ND              | ND                | 0.83  | 0.89              | 105                   | ND                             | ND                     | ND    | ND               | 0.59  | 1.5               | 96  |  |
| 5        | 1                               | 3.9   | 2.4                     | ND              | ND                | 0.39  | 0.44              | 113                   | 0.49                           | 1.6                    | 3.0   | 4.0              | 0.042 | ND                | 122 |  |
|          | 2                               | 4.3   | 1.9                     | ND              | ND                | 0.37  | 0.42              | 119                   | 0.57                           | ND                     | 2.4   | ND               | 0     | ND                | 74  |  |
|          | no-soil control                 | 3.0   | n.a.                    | ND              | n.a.              | 0.47  | n.a.              | 75                    | 0.89                           | n.a.                   | 2.1   | n.a.             | 0.12  | n.a.              | 74  |  |
|          | dark control                    | ND    | ND                      | ND              | ND                | 4.3   | 3.8               | 104                   | ND                             | ND                     | ND    | ND               | 2.3   | 9.5               | 93  |  |
| 10       | 1                               | 8.5   | 4.1                     | 0.25            | 0.41              | 0.72  | 0.85              | 123                   | 1.8                            | ND                     | 6.0   | ND               | 0.047 | ND                | 99  |  |
|          | 2                               | 7.7   | 4.1                     | 0.64            | 0.23              | 0.72  | 0.83              | 118                   | 2.1                            | ND                     | 5.6   | ND               | 0.055 | 0.077             | 96  |  |
|          | no-soil control                 | 5.9   | n.a.                    | 0.17            | n.a.              | 1.5   | n.a.              | 76                    | 0.99                           | n.a.                   | 3.3   | n.a.             | 0.37  | n.a.              | 54  |  |
|          | dark control                    | ND    | ND                      | ND              | ND                | 8.5   | 8.1               | 105                   | ND                             | ND                     | ND    | ND               | 6.5   | 15                | 102 |  |
| 50       | 1                               | 45    | 20                      | 3.5             | 2.4               | 4.9   | 5.7               | 135                   | 6.0                            | 6.1                    | 21    | 13               | 0.35  | 0.56              | 78  |  |
|          | 2                               | 44    | 23                      | 3.3             | 4.0               | 3.6   | 5.4               | 135                   | 7.6                            | 6.3                    | 13    | 21               | 0.39  | 0.81              | 70  |  |
|          | no-soil control                 | 38    | n.a.                    | 2.8             | n.a.              | 7.6   | n.a.              | 101                   | 4.8                            | n.a.                   | 16    | n.a.             | 1.5   | n.a.              | 52  |  |
|          | dark control                    | ND    | ND                      | ND              | ND                | 43    | 39                | 105                   | ND                             | ND                     | ND    | ND               | 32    | 69                | 98  |  |
| 100      | 1                               | 85    | 39                      | 6.1             | 4.4               | 8.8   | 10                | 127                   | 13                             | 13                     | 50    | 36               | 0.61  | 1.8               | 94  |  |
|          | 2                               | 92    | 49                      | 7.5             | 6.3               | 9.3   | 12                | 142                   | 11                             | 5.4                    | 44    | 14               | 0.77  | 1.8               | 75  |  |
|          | no-soil control                 | 86    | n.a.                    | 5.4             | n.a.              | 21    | n.a.              | 114                   | 3.5                            | n.a.                   | 11    | n.a.             | 4.5   | n.a.              | 18  |  |
|          | dark control                    | ND    | ND                      | ND              | ND                | 81    | 79                | 101                   | ND                             | ND                     | ND    | ND               | 72    | 130               | 106 |  |

| $C_{in}$ | TBO photoproducts |                 |                   |       |                   |         | ALT-CAP |            |       |       |       |                   | ALT-CAP-OH |              |            |       |       |       |                   |       |
|----------|-------------------|-----------------|-------------------|-------|-------------------|---------|---------|------------|-------|-------|-------|-------------------|------------|--------------|------------|-------|-------|-------|-------------------|-------|
|          | TBO-OH            |                 | TBO               |       | mass recovery (%) | ALT-CAP |         | ALT-CAP-OH |       | ALT   |       | mass recovery (%) | ALT-CAP    |              | ALT-CAP-OH |       | ALT   |       | mass recovery (%) |       |
|          | $C_w$             | $C_s$           | $C_w$             | $C_s$ |                   | $C_w$   | $C_s$   | $C_w$      | $C_s$ | $C_w$ | $C_s$ |                   | $C_w$      | $C_s$        | $C_w$      | $C_s$ | $C_w$ | $C_s$ |                   | $C_w$ |
| 1        | 1                 | 2.0             | ND                | ND    | ND                | 252     | 0.34    | 0.89       | 0.39  | ND    | 0.019 | 0.076             | 99         | 0.089        | ND         | ND    | ND    | ND    | ND                | 0     |
|          | 2                 | ND <sup>a</sup> | ND                | ND    | ND                | 0       | 0.30    | 1.1        | 0.32  | ND    | 0.015 | 0.056             | 93         | 0.097        | ND         | ND    | ND    | ND    | ND                | 0     |
|          | no-soil control   | 1.1             | n.a. <sup>b</sup> | ND    | n.a.              | 143     | 0.47    | n.a.       | 0.47  | n.a.  | 0.039 | n.a.              | 98         | 0.14         | n.a.       | 0.33  | n.a.  | ND    | n.a.              | 42    |
|          | dark control      | ND              | ND                | 0.32  | 2.9               | 104     | ND      | ND         | ND    | ND    | 0.25  | 1.0               | 51         | ND           | ND         | ND    | ND    | 0.25  | 1.0               | 51    |
| 5        | 1                 | 6.2             | 11                | 0.071 | 0.54              | 220     | 2.1     | 4.2        | 2.2   | 1.2   | 0.11  | 0.29              | 117        | 0.46         | 0.56       | 1.2   | 1.8   | ND    | ND                | 40    |
|          | 2                 | 5.8             | 4.9               | 0.058 | 0.42              | 177     | 1.9     | 4.0        | 1.9   | 1.1   | 0.090 | 0.27              | 105        | 0.49         | 0.43       | 1.1   | 2.4   | ND    | ND                | 43    |
|          | no-soil control   | 4.5             | n.a.              | 0.16  | n.a.              | 113     | 2.5     | n.a.       | 2.2   | n.a.  | 0.20  | n.a.              | 100        | 0.27         | n.a.       | 4.1   | n.a.  | ND    | n.a.              | 101   |
|          | dark control      | ND              | ND                | 3.0   | 12                | 119     | ND      | ND         | ND    | ND    | 1.5   | 7.2               | 66         | ND           | ND         | ND    | ND    | 1.5   | 7.2               | 66    |
| 10       | 1                 | 10              | 8.6               | 0.14  | 1.2               | 153     | 4.4     | 6.7        | 4.1   | 2.2   | 0.23  | 0.55              | 110        | 0.99         | 1.9        | 7.3   | 7.0   | ND    | ND                | 113   |
|          | 2                 | 11              | 10                | 0.20  | 0.80              | 168     | 4.3     | 8.8        | 3.5   | 2.3   | 0.19  | 0.62              | 110        | 0.90         | 1.8        | 6.2   | 4.3   | ND    | ND                | 91    |
|          | no-soil control   | 8.8             | n.a.              | 0.36  | n.a.              | 109     | 5.4     | n.a.       | 4.5   | n.a.  | 0.46  | n.a.              | 104        | 0.42         | n.a.       | 8.1   | n.a.  | ND    | n.a.              | 101   |
|          | dark control      | ND              | ND                | 8.0   | 20                | 131     | ND      | ND         | ND    | ND    | 3.5   | 9.6               | 59         | ND           | ND         | ND    | ND    | 3.5   | 9.6               | 59    |
| 50       | 1                 | 45              | 49                | 0.98  | 5.8               | 143     | 22      | 50         | 19    | 13    | 1.1   | 4.0               | 117        | 4.0          | 7.7        | 37    | 25    | ND    | ND                | 108   |
|          | 2                 | 47              | 31                | 1.4   | 3.4               | 137     | 23      | 38         | 20    | 13    | 1.3   | 3.0               | 116        | 4.4          | 8.9        | 37    | 28    | ND    | ND                | 110   |
|          | no-soil control   | 42              | n.a.              | 2.0   | n.a.              | 105     | 21      | n.a.       | 23    | n.a.  | 1.9   | n.a.              | 91         | DATA MISSING |            |       |       |       |                   |       |
|          | dark control      | ND              | ND                | 28    | 110               | 111     | ND      | ND         | ND    | ND    | 14    | 55                | 55         | ND           | ND         | ND    | ND    | 14    | 55                | 55    |
| 100      | 1                 | 78              | 95                | 2.5   | 11                | 127     | 37      | 100        | 33    | 29    | 1.8   | 8.5               | 106        | 5.4          | 8.7        | 81    | 54    | ND    | ND                | 118   |
|          | 2                 | 75              | 68                | 2.2   | 12                | 115     | 40      | 80         | 37    | 24    | 2.3   | 6.6               | 107        | 13           | 38         | 69    | 52    | ND    | ND                | 103   |
|          | no-soil control   | 73              | n.a.              | 4.1   | n.a.              | 92      | 35      | n.a.       | 44    | n.a.  | 3.5   | n.a.              | 82         | 4.8          | n.a.       | 81    | n.a.  | ND    | n.a.              | 101   |
|          | dark control      | ND              | ND                | 61    | 160               | 100     | ND      | ND         | ND    | ND    | 38    | 150               | 76         | ND           | ND         | ND    | ND    | 38    | 150               | 76    |

177 <sup>a</sup> ND: not detected;

178 <sup>b</sup> n.a.: not applicable. The no-soil control only contained aqueous phase.

179 **Table S5.** Observed mass distribution across water, soil, glass tubes, and tube caps  
 180 when 0.1, 1, 10  $\mu\text{g/L}$  of  $17\alpha\text{-TBOH}$  was spiked into glass tubes with water only or  
 181 with soil and water.

|                   |     | spiked levels $17\alpha\text{-TBOH}$ mass (%) |      |      |     |
|-------------------|-----|-----------------------------------------------|------|------|-----|
|                   |     | water                                         | soil | tube | cap |
| water only        | 0.1 | 49                                            | -    | 56   | 0   |
|                   | 1   | 19                                            | -    | 78   | 0   |
|                   | 10  | 28                                            | -    | 59   | 0   |
| soil-water system | 0.1 | 66                                            | 16   | 0    | 0   |
|                   | 1   | 58                                            | 18   | 8    | 0   |
|                   | 10  | 52                                            | 14   | 30   | 0   |

183 **Table S6.** Physical properties of soil columns and estimated hydraulic parameters based upon bromide tracer data.

| experiment #   | column       | recovery (%) | R <sup>2</sup> | volumetric water content ( $\theta$ ) (cm <sup>3</sup> /cm <sup>3</sup> ) | pore water velocity ( $v$ ) (cm/min) <sup>a</sup> |           | bulk density ( $\rho_b$ ) (g/mL) | dispersion coefficient ( $D$ ) (cm <sup>2</sup> /min) |
|----------------|--------------|--------------|----------------|---------------------------------------------------------------------------|---------------------------------------------------|-----------|----------------------------------|-------------------------------------------------------|
|                |              |              |                |                                                                           | measured                                          | estimated |                                  |                                                       |
| 1              | light        | 99           | 0.996          | 0.43                                                                      | 0.13                                              | 0.15      | 1.52                             | 0.11                                                  |
|                | dark control | 100          | 0.997          | 0.40                                                                      | 0.12                                              | 0.15      | 1.58                             | 0.07                                                  |
| 2              | light        | 100          | 0.997          | 0.37                                                                      | 0.16                                              | 0.18      | 1.67                             | 0.13                                                  |
|                | dark control | 100          | 0.996          | 0.42                                                                      | 0.11                                              | 0.21      | 1.54                             | 0.12                                                  |
| 3              | light        | 100          | 0.997          | 0.42                                                                      | 0.13                                              | 0.21      | 1.54                             | 0.12                                                  |
|                | dark control | 100          | 0.997          | 0.38                                                                      | 0.15                                              | 0.21      | 1.65                             | 0.12                                                  |
| 4 <sup>b</sup> | light        | -            | -              | 0.40                                                                      | 0.14                                              | -         | 1.59                             | -                                                     |
|                | dark control | -            | -              | 0.42                                                                      | 0.12                                              | -         | 1.53                             | -                                                     |
| 5              | light        | 100          | 0.997          | 0.42                                                                      | 0.14                                              | 0.18      | 1.53                             | 0.13                                                  |
|                | dark control | 100          | 0.997          | 0.43                                                                      | 0.12                                              | 0.21      | 1.52                             | 0.12                                                  |
| 6              | light        | 98           | 0.996          | 0.42                                                                      | 0.13                                              | 0.16      | 1.54                             | 0.20                                                  |
|                | dark control | 99           | 0.996          | 0.41                                                                      | 0.13                                              | 0.15      | 1.56                             | 0.15                                                  |

184 <sup>a</sup> Measured velocity can be calculated as  $v = Q/(A \times \theta)$ , where Q and A is volumetric flow rate (cm<sup>3</sup>/min) and cross-sectional area of the soil column (cm<sup>2</sup>), respectively.

185 Estimated  $v$  was obtained by CXTFIT program.

186 <sup>b</sup> Experiment #4 was conducted to assess solute reproducibility, no tracer test was done.

187 **Table S7.** Detailed transport parameters for parent compounds in CXTFIT model.<sup>a</sup>

| experiment | column | compound          | $R_{mod}^b$ | $\beta$         | $\omega$ | R <sup>2</sup> |
|------------|--------|-------------------|-------------|-----------------|----------|----------------|
| 1          | dark   | 17 $\beta$ -TBOH  | 21.0        | 0.12            | 2.76     | 0.99           |
| 2          | dark   | 17 $\alpha$ -TBOH | 14.1        | 0.19            | 1.34     | 0.99           |
|            |        | ALT               | 22.6        | 0.23            | 2.28     | 0.99           |
| 3          | dark   | 17 $\alpha$ -TBOH | 14.8        | 0.16            | 1.57     | 0.99           |
|            |        | ALT               | 20.4        | 0.20            | 2.48     | 0.99           |
| 5          | dark   | 17 $\alpha$ -TBOH | 13.7        | 0.18            | 1.29     | 0.96           |
|            |        | ALT               | 22.6        | 0.17            | 2.69     | 0.93           |
| 6          | dark   | ALT               | 25.4        | NE <sup>c</sup> | NE       | 0.99           |

188 <sup>a</sup> The transport parameters were obtained by two-site non-equilibrium model.

189 <sup>b</sup>  $R_{mod}$  represents retardation factor obtained from modelling.

190 <sup>c</sup> NE = Not estimated.



191 **Table S8.** Fitted parameters for Br<sup>-</sup> and solutes during modelling.

| experiment | solute                                                            | model                       | fitted parameter                   |
|------------|-------------------------------------------------------------------|-----------------------------|------------------------------------|
| 1-6        | Br <sup>-</sup>                                                   | Convection-dispersion model | $v$ and $D$                        |
| 1-6        | 17 $\alpha$ -TBOH, ALT, 17 $\beta$ -TBOH, and their photoproducts | Two-Site                    | $R_{mod}$ , $\beta$ , and $\omega$ |

192

193 **Table S9.** Elution times, multiple reaction monitoring (MRM) transitions, fragmenter  
 194 voltages, and collision energies for TBA metabolites, altrenogest, and photoproducts  
 195 in LC-MS/MS analysis.

| compound                         | retention<br>time (min) | MRM transitions<br>(m/z) | fragmentor<br>(V) | collision<br>energy (eV) |
|----------------------------------|-------------------------|--------------------------|-------------------|--------------------------|
| 17 $\alpha$ -TBOH                | 7.55                    | 271>253 (271>211)        | 135 (135)         | 30 (30)                  |
| 5-OH-17 $\alpha$ -TBOH           | 6.62                    | 271>211 (271>253)        | 135 (135)         | 30 (30)                  |
| 12-OH-17 $\alpha$ -TBOH          | 7.13                    | 271>211 (271>253)        | 135 (135)         | 30 (30)                  |
| 17 $\beta$ -TBOH                 | 7.23                    | 271>253 (271>211)        | 135 (135)         | 30 (30)                  |
| 5-OH-17 $\beta$ -TBOH            | 4.87                    | 271>211 (271>253)        | 135 (135)         | 30 (30)                  |
| 12-OH-17 $\beta$ -TBOH           | 5.85                    | 271>211 (271>253)        | 135 (135)         | 30 (30)                  |
| TBO                              | 6.65                    | 269>225 (269>169)        | 135 (135)         | 28 (28)                  |
| TBO-OH                           | 5.14                    | 269>169 (269>225)        | 135 (135)         | 28 (28)                  |
| ALT                              | 9.37                    | 311>227 (311>269)        | 82 (82)           | 24 (12)                  |
| ALT-CAP                          | 8.41                    | 311>269 (311>227)        | 82 (82)           | 12 (24)                  |
| ALT-CAP-OH                       | 5.43                    | 311>269 (311>227)        | 82 (82)           | 12 (24)                  |
| 17 $\beta$ -d <sub>3</sub> -TBOH | 7.26                    | 274>256 (274>214)        | 135 (135)         | 30 (30)                  |

196

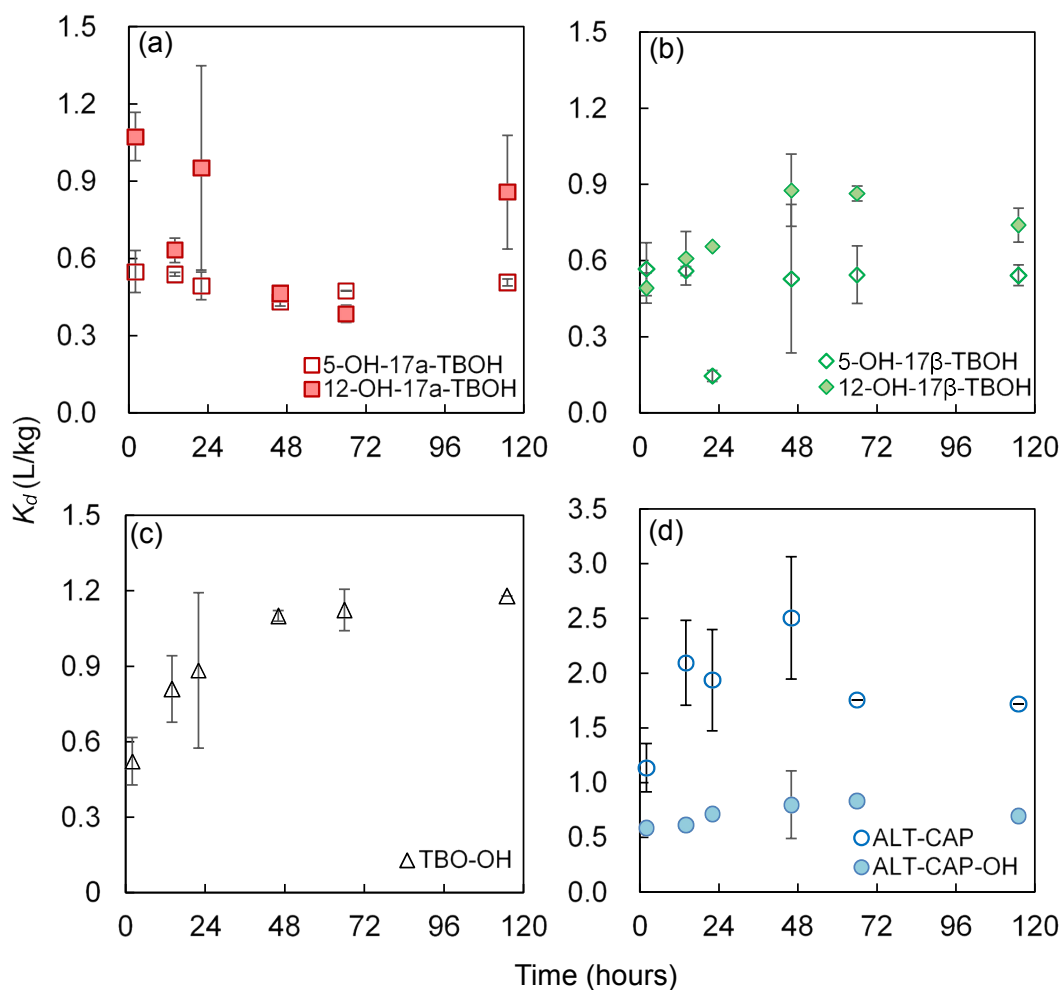

197

198 **Figure S1.** The partitioning coefficients in single concentration ( $\sim 50 \mu\text{g/L}$  as parents  
 199 before irradiation) time series study for (a) 17 $\alpha$ -TBOH, (b) 17 $\beta$ -TBOH, (c) TBO and  
 200 (d) ALT photoproducts. Sorption was tested in duplicates at each time spot. The  
 201 sorption system generally reaches equilibrium at 22 hours. Error bars represent  
 202 standard deviations.

203

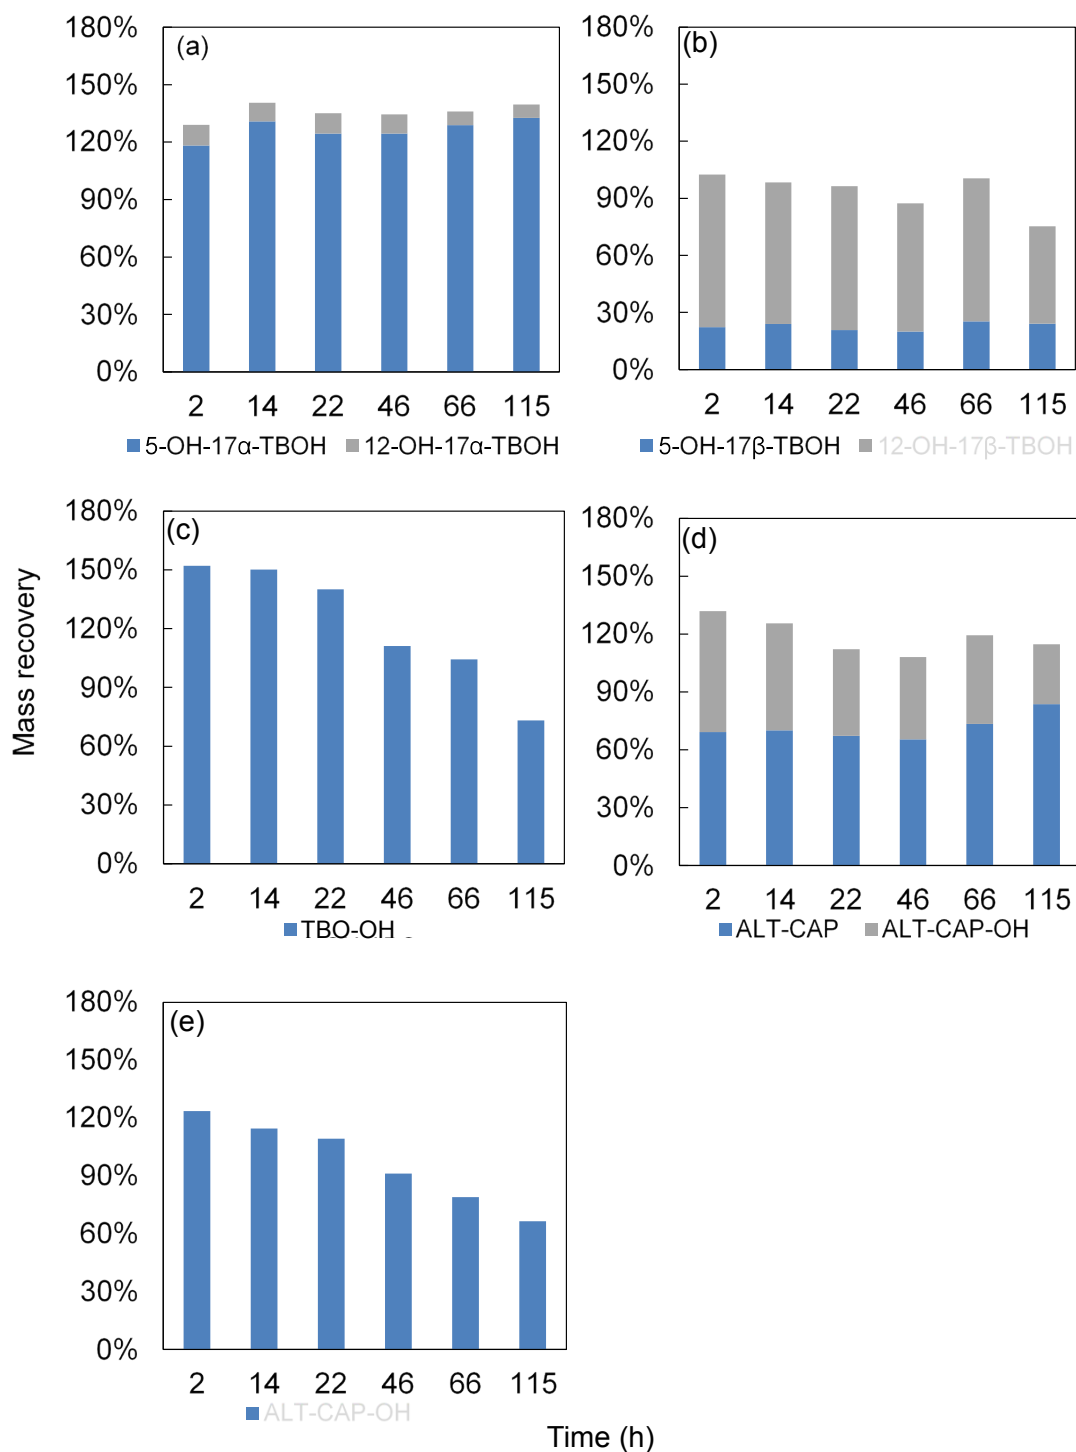

204

205 **Figure S2.** The mass recoveries in single concentration ( $\sim 50 \mu\text{g/L}$  as parents before  
 206 irradiation) time series study for (a) 17 $\alpha$ -TBOH, (b) 17 $\beta$ -TBOH, (c) TBO (d) ALT  
 207 and (e) ALT-CAP photoproducts. Product-to-parent reversion was observed for ALT-  
 208 CAP-OH. Mass recoveries were calculated as the mass ratio of photoproducts  
 209 detected over the photoproducts spiked.

210

211

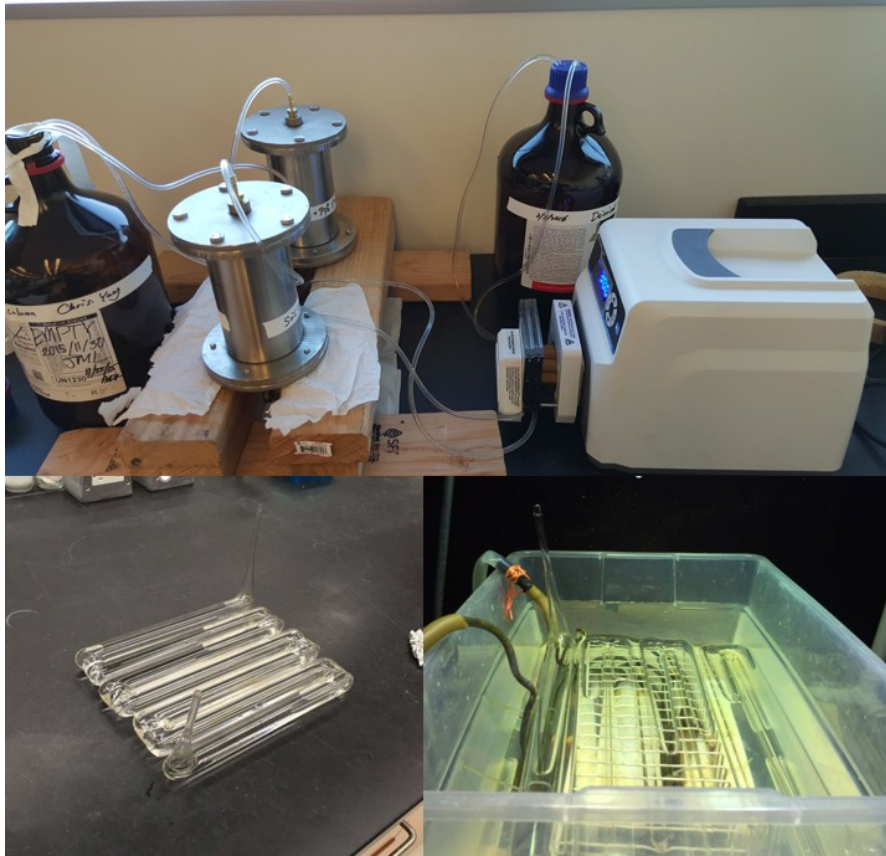

212

213 **Figure S3.** Photographs of soil column and glass coil.

214

215

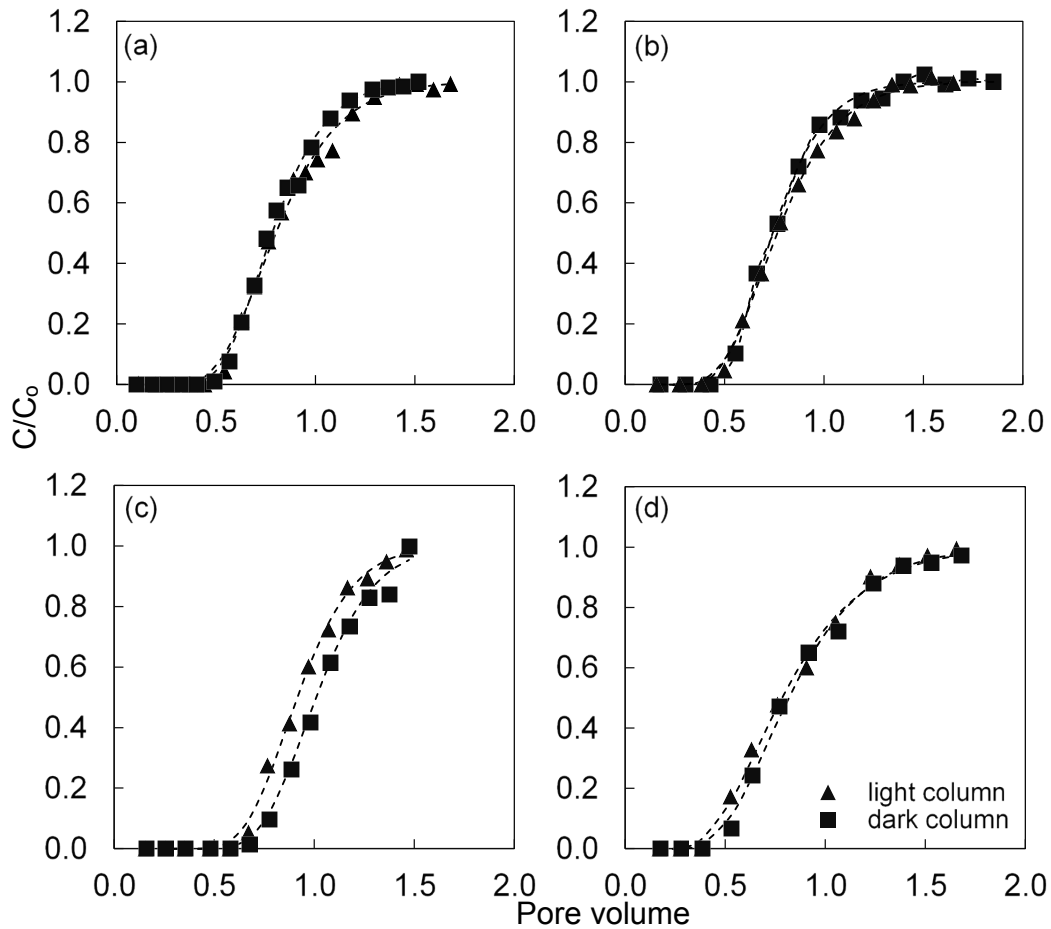

216

217 **Figure S4.** Bromide tracer tests for (a) short-term transport of  $17\beta$ -TBOH in dark  
 218 control column, and  $17\beta$ -TBOH, 5-OH- $17\beta$ -TBOH, and 12-OH- $17\beta$ -TBOH transport  
 219 in light columns; (b) short-term transport of  $17\alpha$ -TBOH in dark control column, and  
 220  $17\alpha$ -TBOH, 5-OH- $17\alpha$ -TBOH, and 12-OH- $17\alpha$ -TBOH in light columns; (c) long-  
 221 term transport of  $17\alpha$ -TBOH in dark control column, and  $17\alpha$ -TBOH, 5-OH- $17\alpha$ -  
 222 TBOH, and 12-OH- $17\alpha$ -TBOH in light columns; and (d) long-term transport of ALT  
 223 in dark control columns, and ALT, ALT-CAP, and ALT-CAP-OH in light columns.

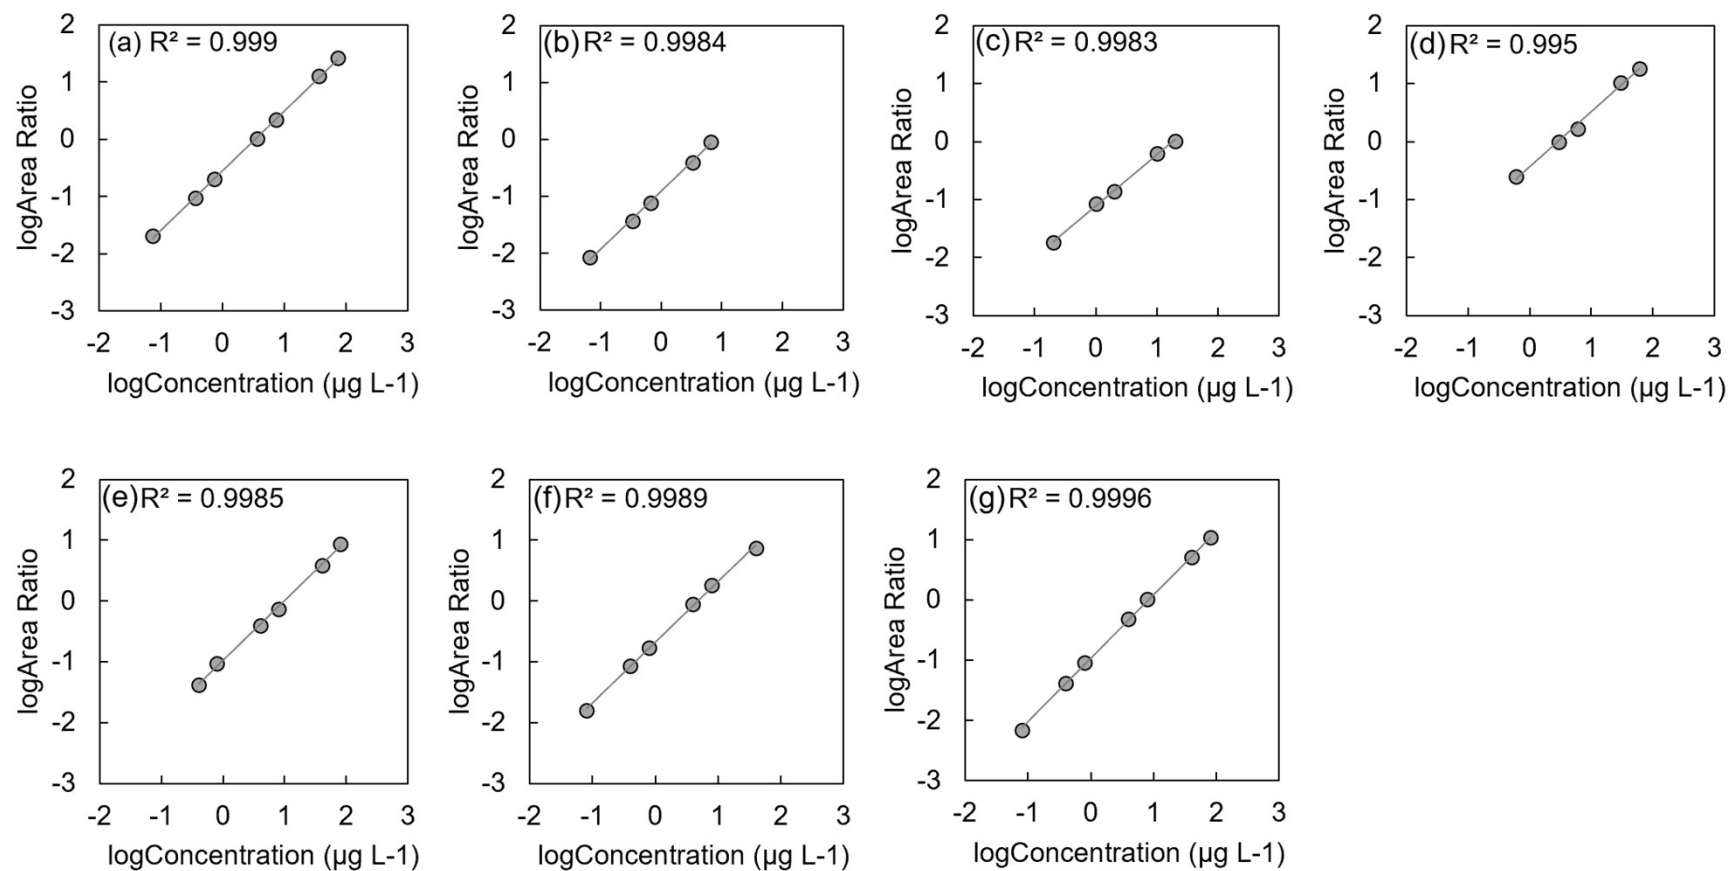

224

225 **Figure S5.** Calibration curves of (a) 5-OH-17 $\alpha$ -TBOH, (b) 12-OH-17 $\alpha$ -TBOH, (c) 5-OH-17 $\beta$ -TBOH, (d) 12-OH-17 $\beta$ -TBOH, (e) TBO-OH, (f) ALT-  
 226 CAP, (g) ALT-CAP-OH at 0.1-100  $\mu\text{g L}^{-1}$  as parent concentrations before irradiation, corresponding to 0.073-73  $\mu\text{g L}^{-1}$  for 5-OH-17 $\alpha$ -TBOH, 0.0067-  
 227 6.7  $\mu\text{g L}^{-1}$  for 12-OH-17 $\alpha$ -TBOH, 0.02-20  $\mu\text{g L}^{-1}$  for 5-OH-17 $\beta$ -TBOH, 0.06-60  $\mu\text{g L}^{-1}$  for 12-OH-17 $\beta$ -TBOH, and 0.08-80  $\mu\text{g L}^{-1}$  for TBO-OH, ALT-  
 228 CAP, and ALT-CAP-OH. When observed, calibration curves with fewer than seven data points represent no detection of the analytes at low  
 229 concentrations. Area ratio refers to ratio of the LC-MS/MS peak areas of the analytes over that of the isotopic internal standard. The data was first  
 230 presented in Kenyon et al. (2019)
